# Supplementary material for: Green-solvent extraction of guabijú (Myrcianthes pungens) fruit: a sustainable antioxidant source for oil-in- water emulsions
Source: Research Square preprint supplement (doi:10.21203/rs.3.rs-8148354/v1), 2025-12-22
Supplement: Supplementary file 1 [file 028f88f5928fe9d9e3548652.docx]

**Green-solvent extraction of guabijú (*Myrcianthes pungens*) fruit: a sustainable antioxidant source for oil-in-water emulsions**


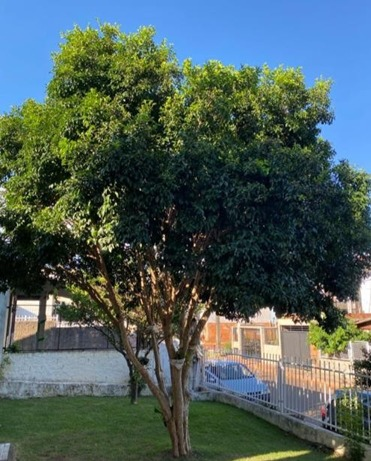

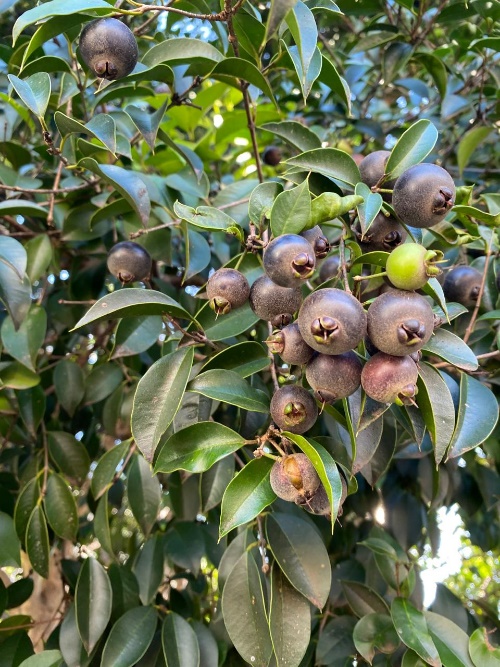


**a**

**b**

Fig S1 Tree (a) where the samples (b) were collected


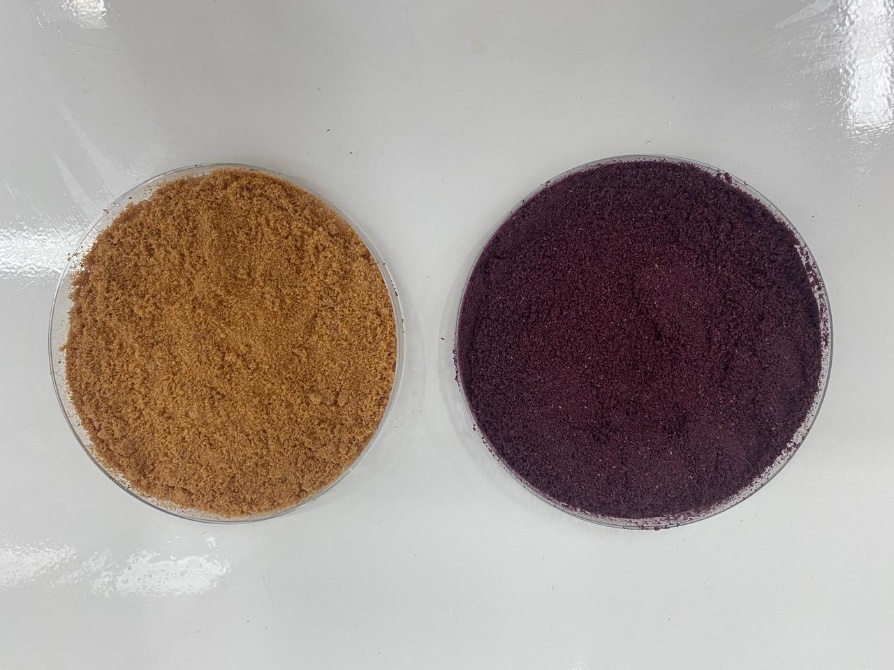


**a**

**b**

Fig S2 Lyophilized powder of guabijú peel (a) and pulp (b)

**Table S1** Analytical validation parameters for the quantification of compounds by HPLC-DAD

| **Compounds** | **Retention time (min)** | **LD (mg.mL-1)** | **LQ (mg.mL-1)** | **Intra-day precision (%)*** | **Equation** | **R²** |
| --- | --- | --- | --- | --- | --- | --- |
| Cyanidin-3-glucoside | 4.693 | 0.0001 | 0.0005 | 1.10 | y = 325.73x + 0.0213 | 0.9979 |
| Gallic acid | 18.857 | 0.0002 | 0.0006 | 3.95 | y= 2473.5x + 2.1999 | 0.9979 |
| Catechin | 26.633 | 0.0008 | 0.0025 | 9.37 | y= 550.15x +1.9202 | 0.9920 |
| Caffeic acid | 30.307 | 0.0001 | 0.0005 | 2.01 | y= 1585.5x -1.1204 | 0.9996 |
| Ellagic acid | 32.383 | 0.0001 | 0.0004 | 6.29 | y= 5762.5x -17.692 | 0.9974 |
| Quercetin | 43.160 | 0.0002 | 0.0006 | 3.42 | y= 1868.1x -7.2438 | 0.9991 |
| Trans-cinnamic acid | 48.160 | 0.0001 | 0.0003 | 2.34 | y= 7155.6x -1.3828 | 0.9998 |

LD: Limit of detection. LQ: Limit of quantification. y: peak area in mAU; x: concentration in mg·mL⁻¹. *Highest coefficient of variation among the three concentrations evaluated. R²: determination coefficient
